# Supplementary material
Source: Springer Nature journal article supplement (https://www.springermedizin.de/resource/supplementary/12885_2008_1534_MOESM4_ESM.pdf/9472262)

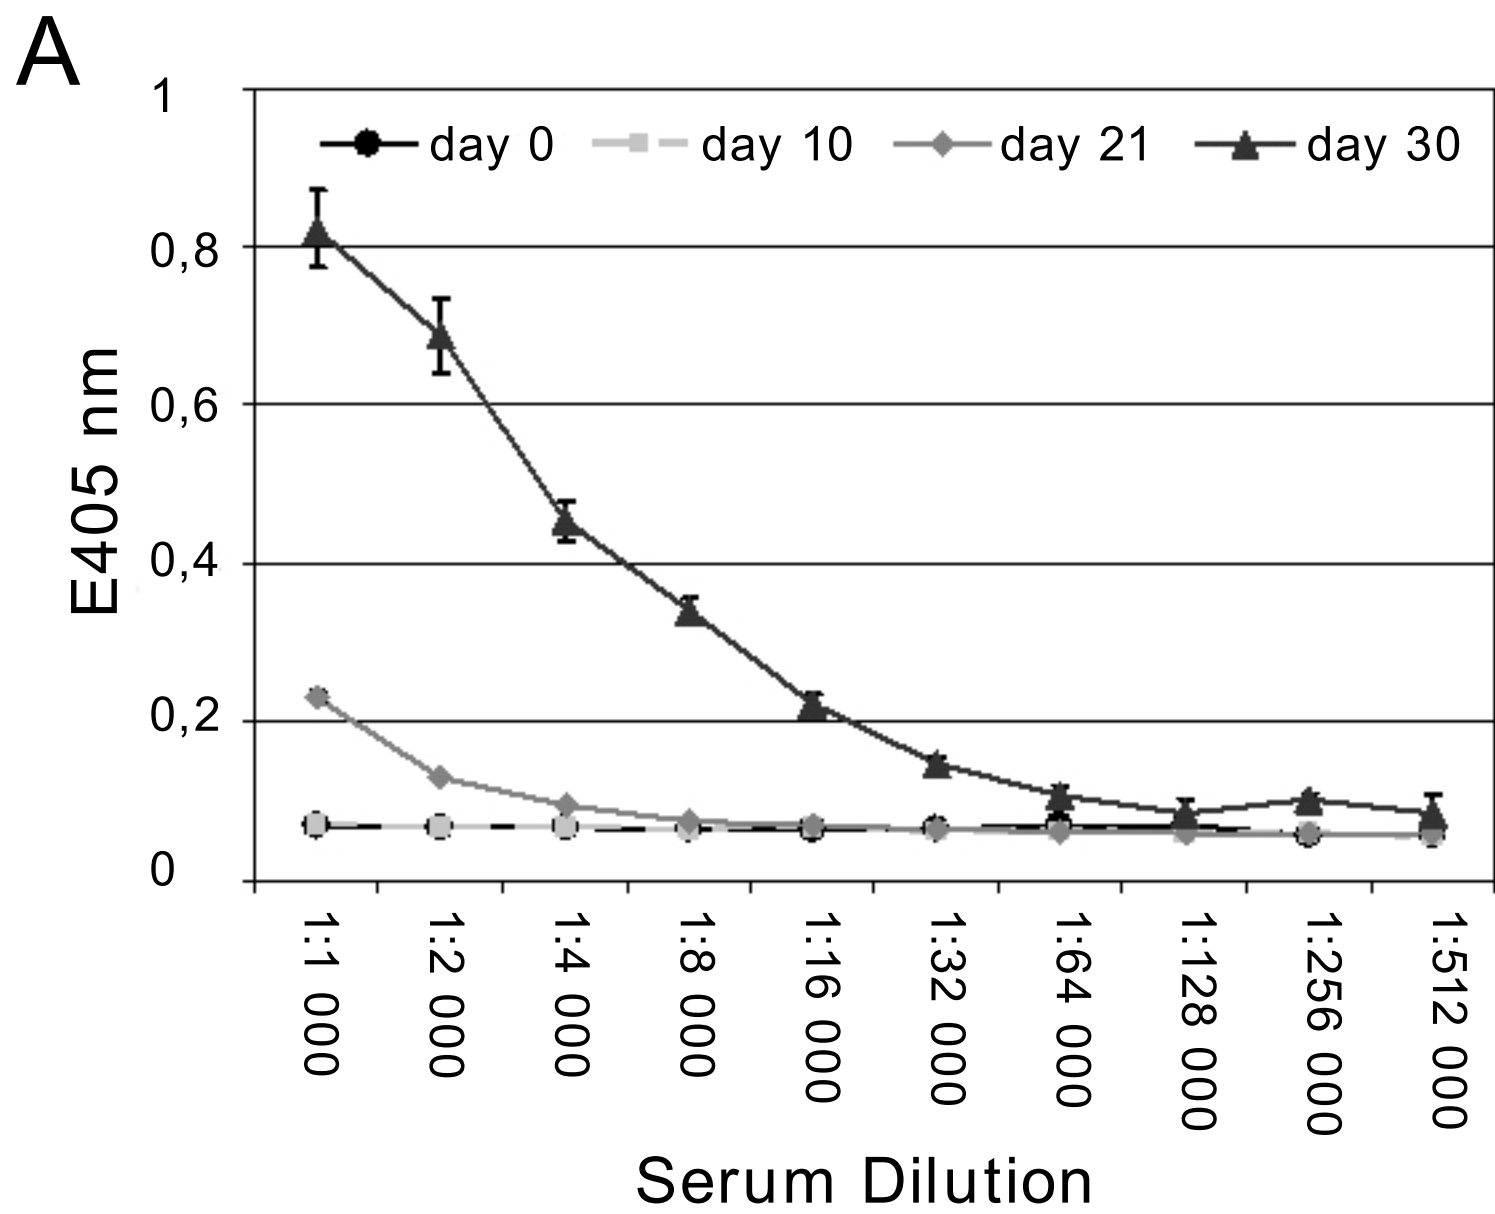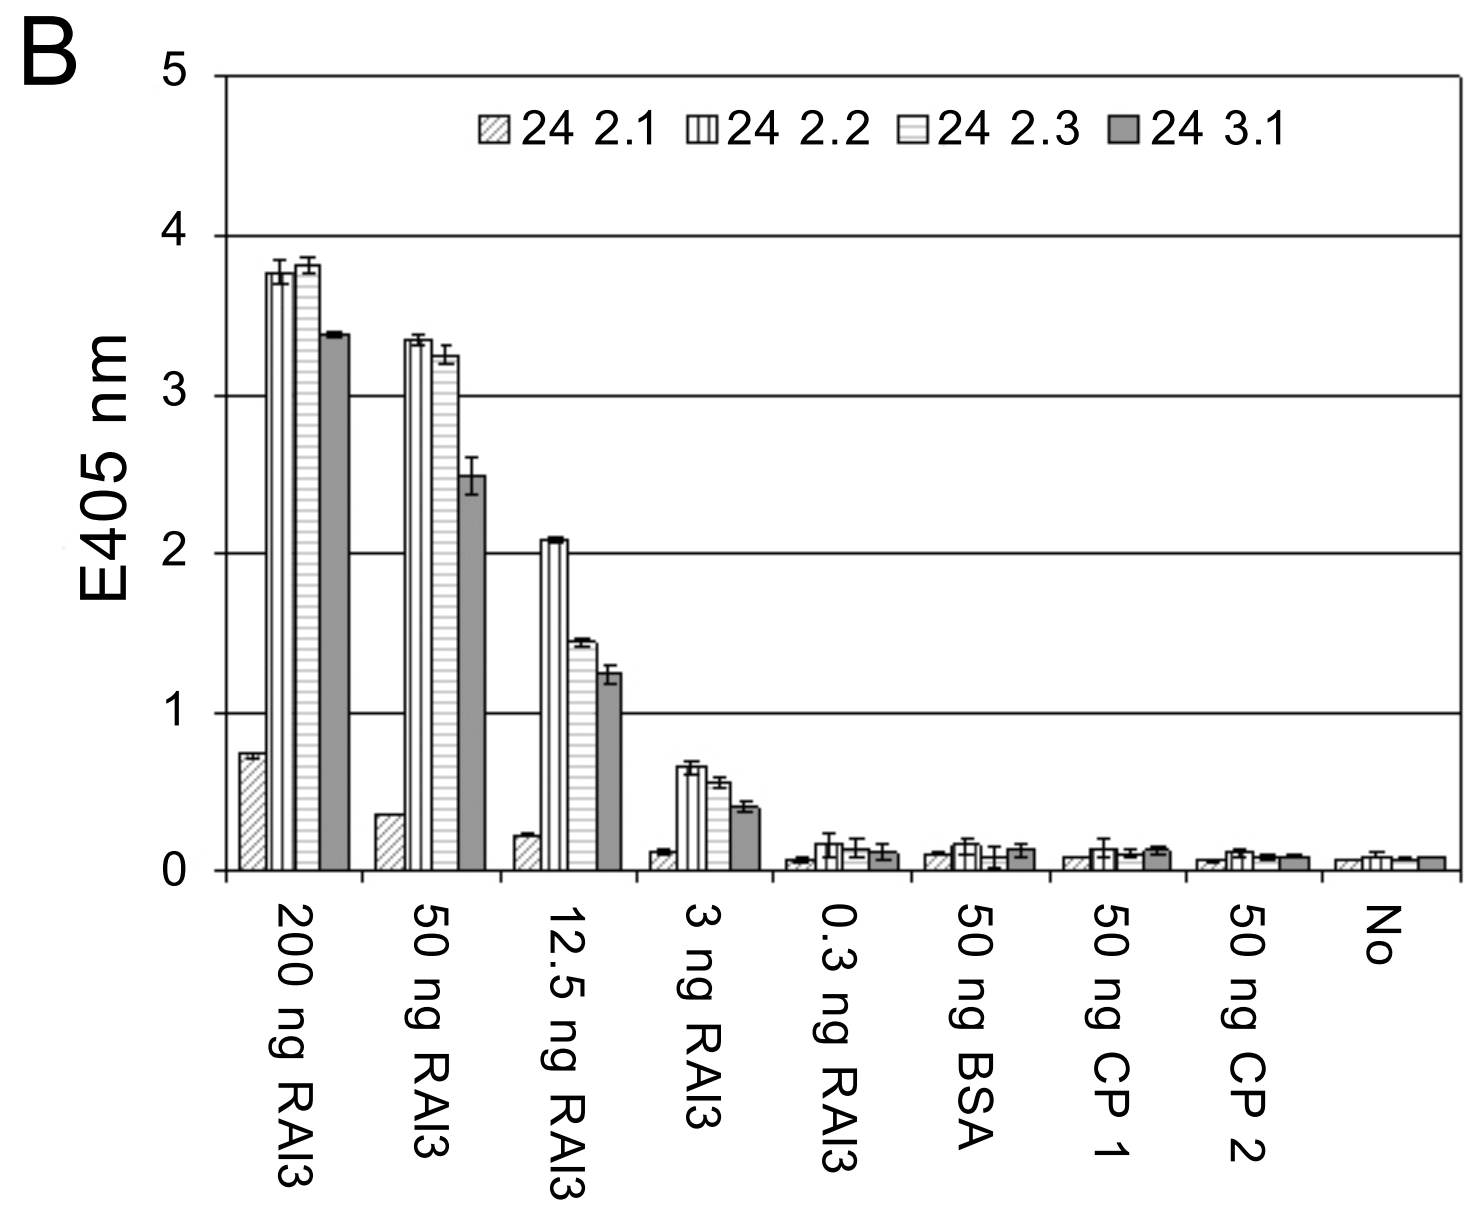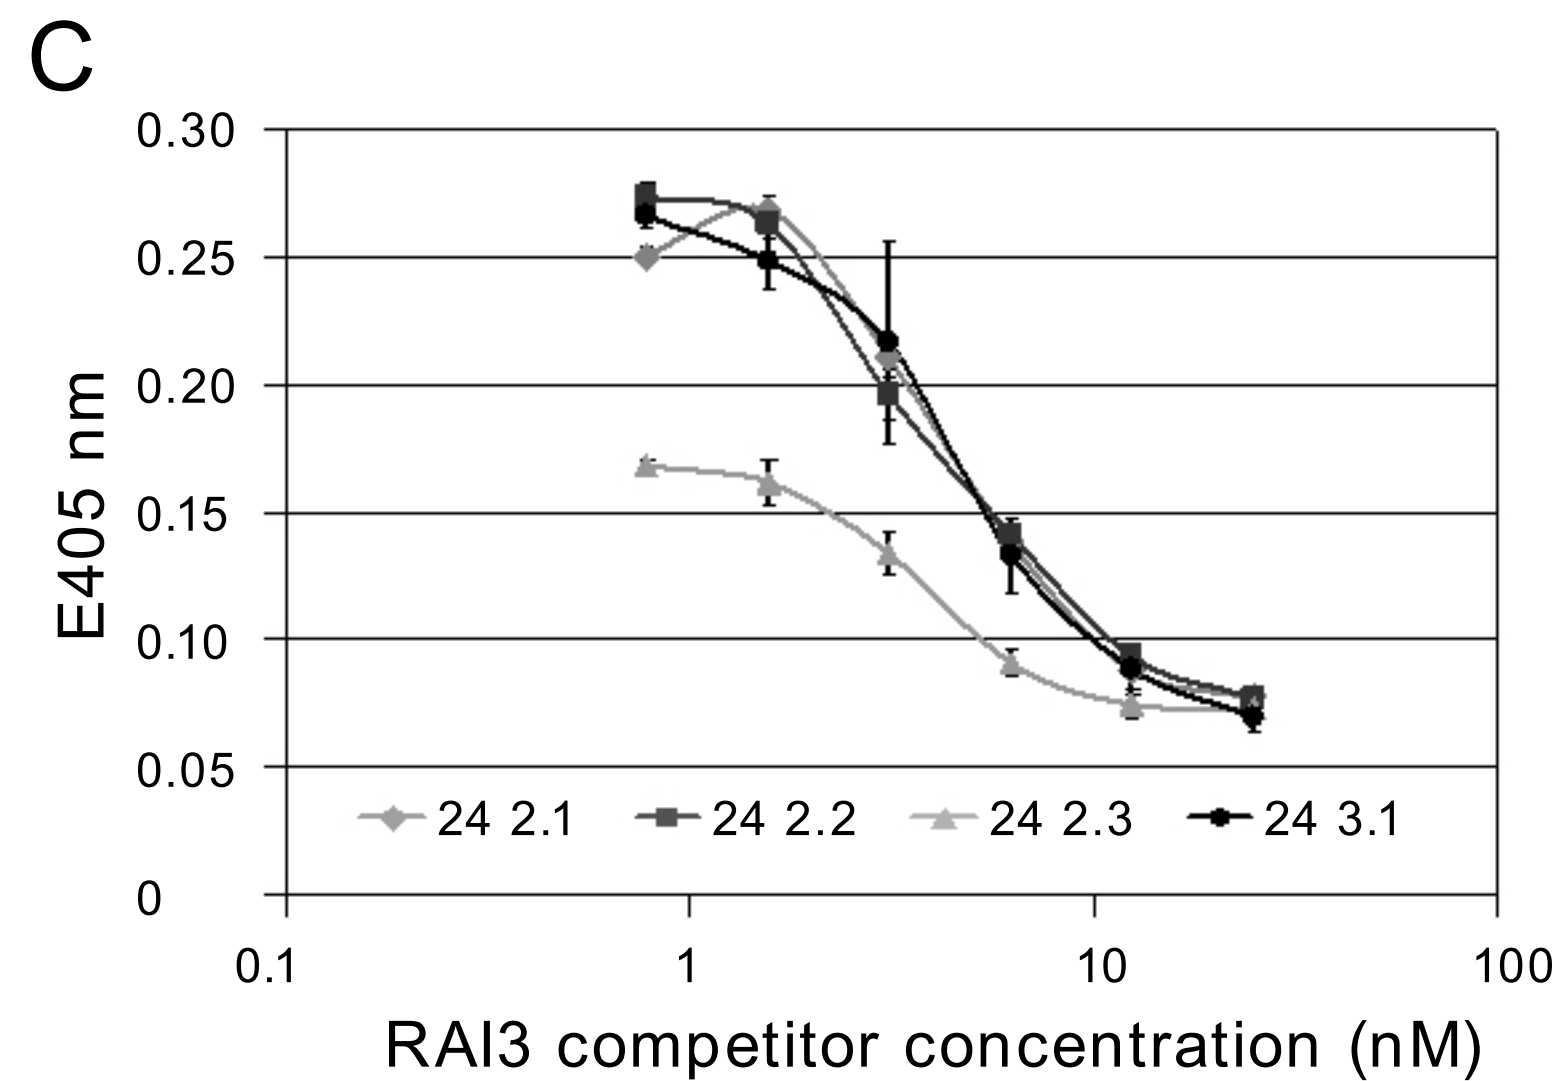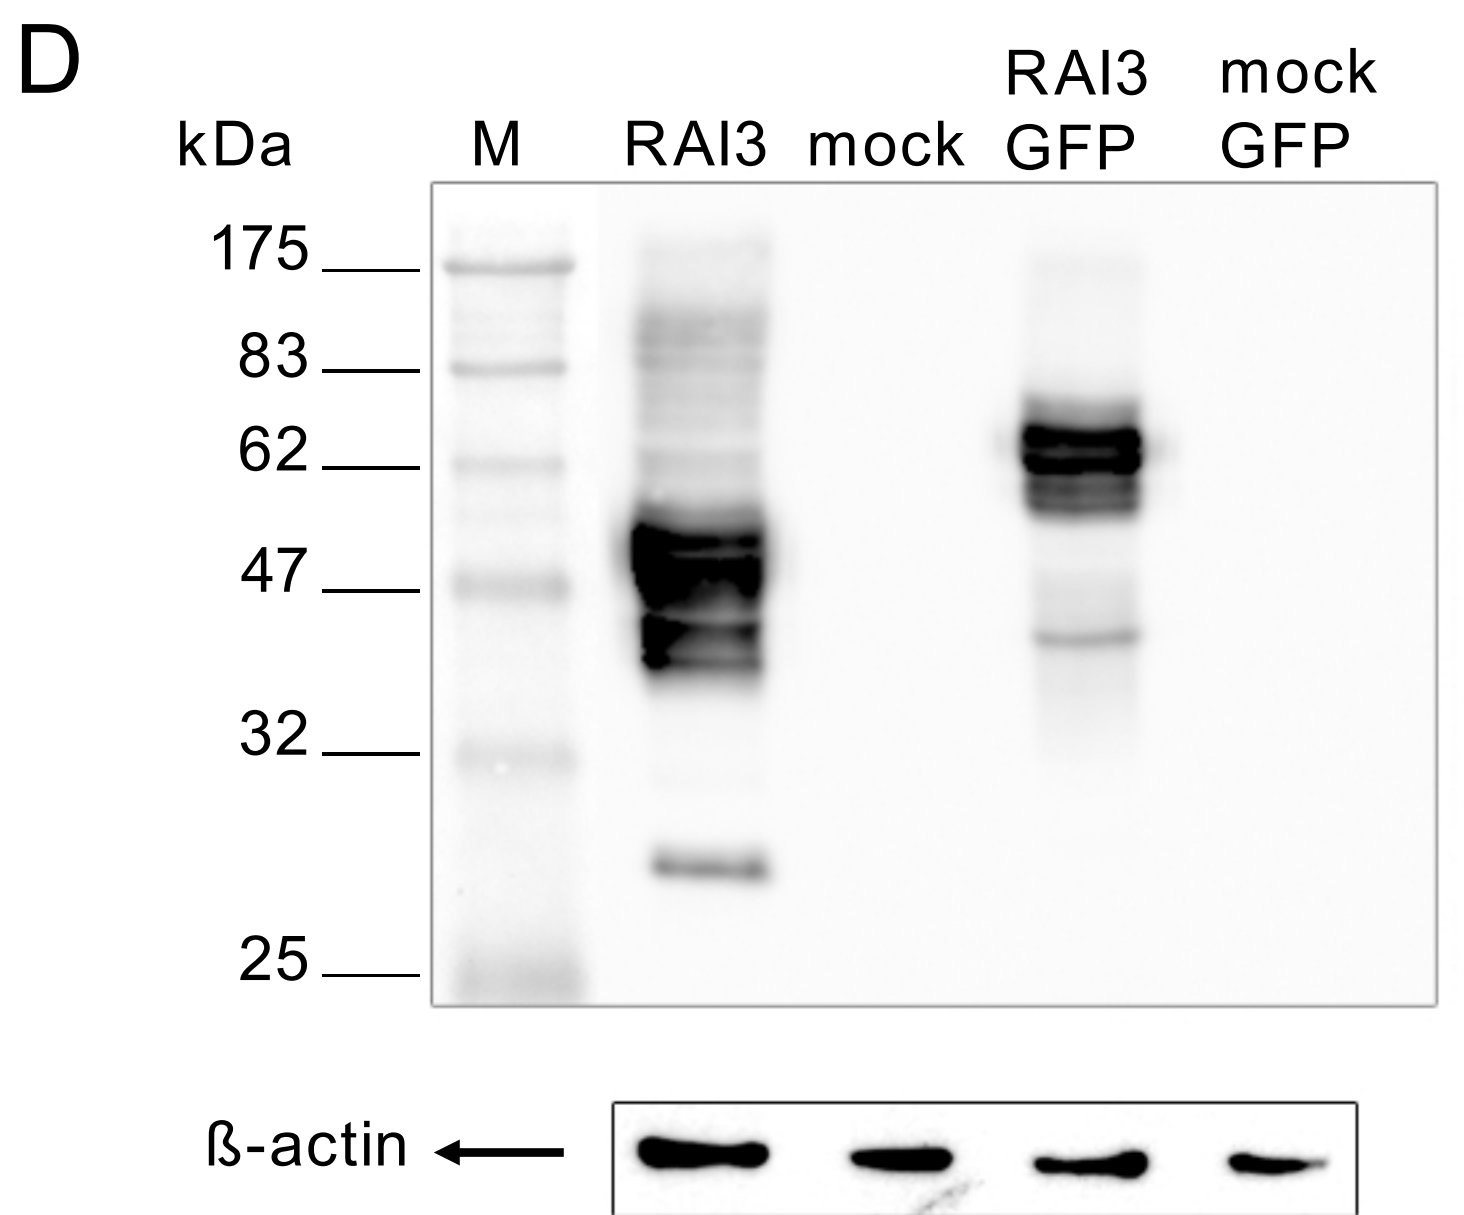

Supplement: MOESM4 [file 9472262]
